# Supplementary material for: Central Nervous System Source Modulates Microglia Function and Morphology In Vitro
Source: Preprints.org preprint supplement (doi:10.20944/preprints202303.0542.v1), 2023-03-31
Supplement: Supplementary file 1 [file supplementary]

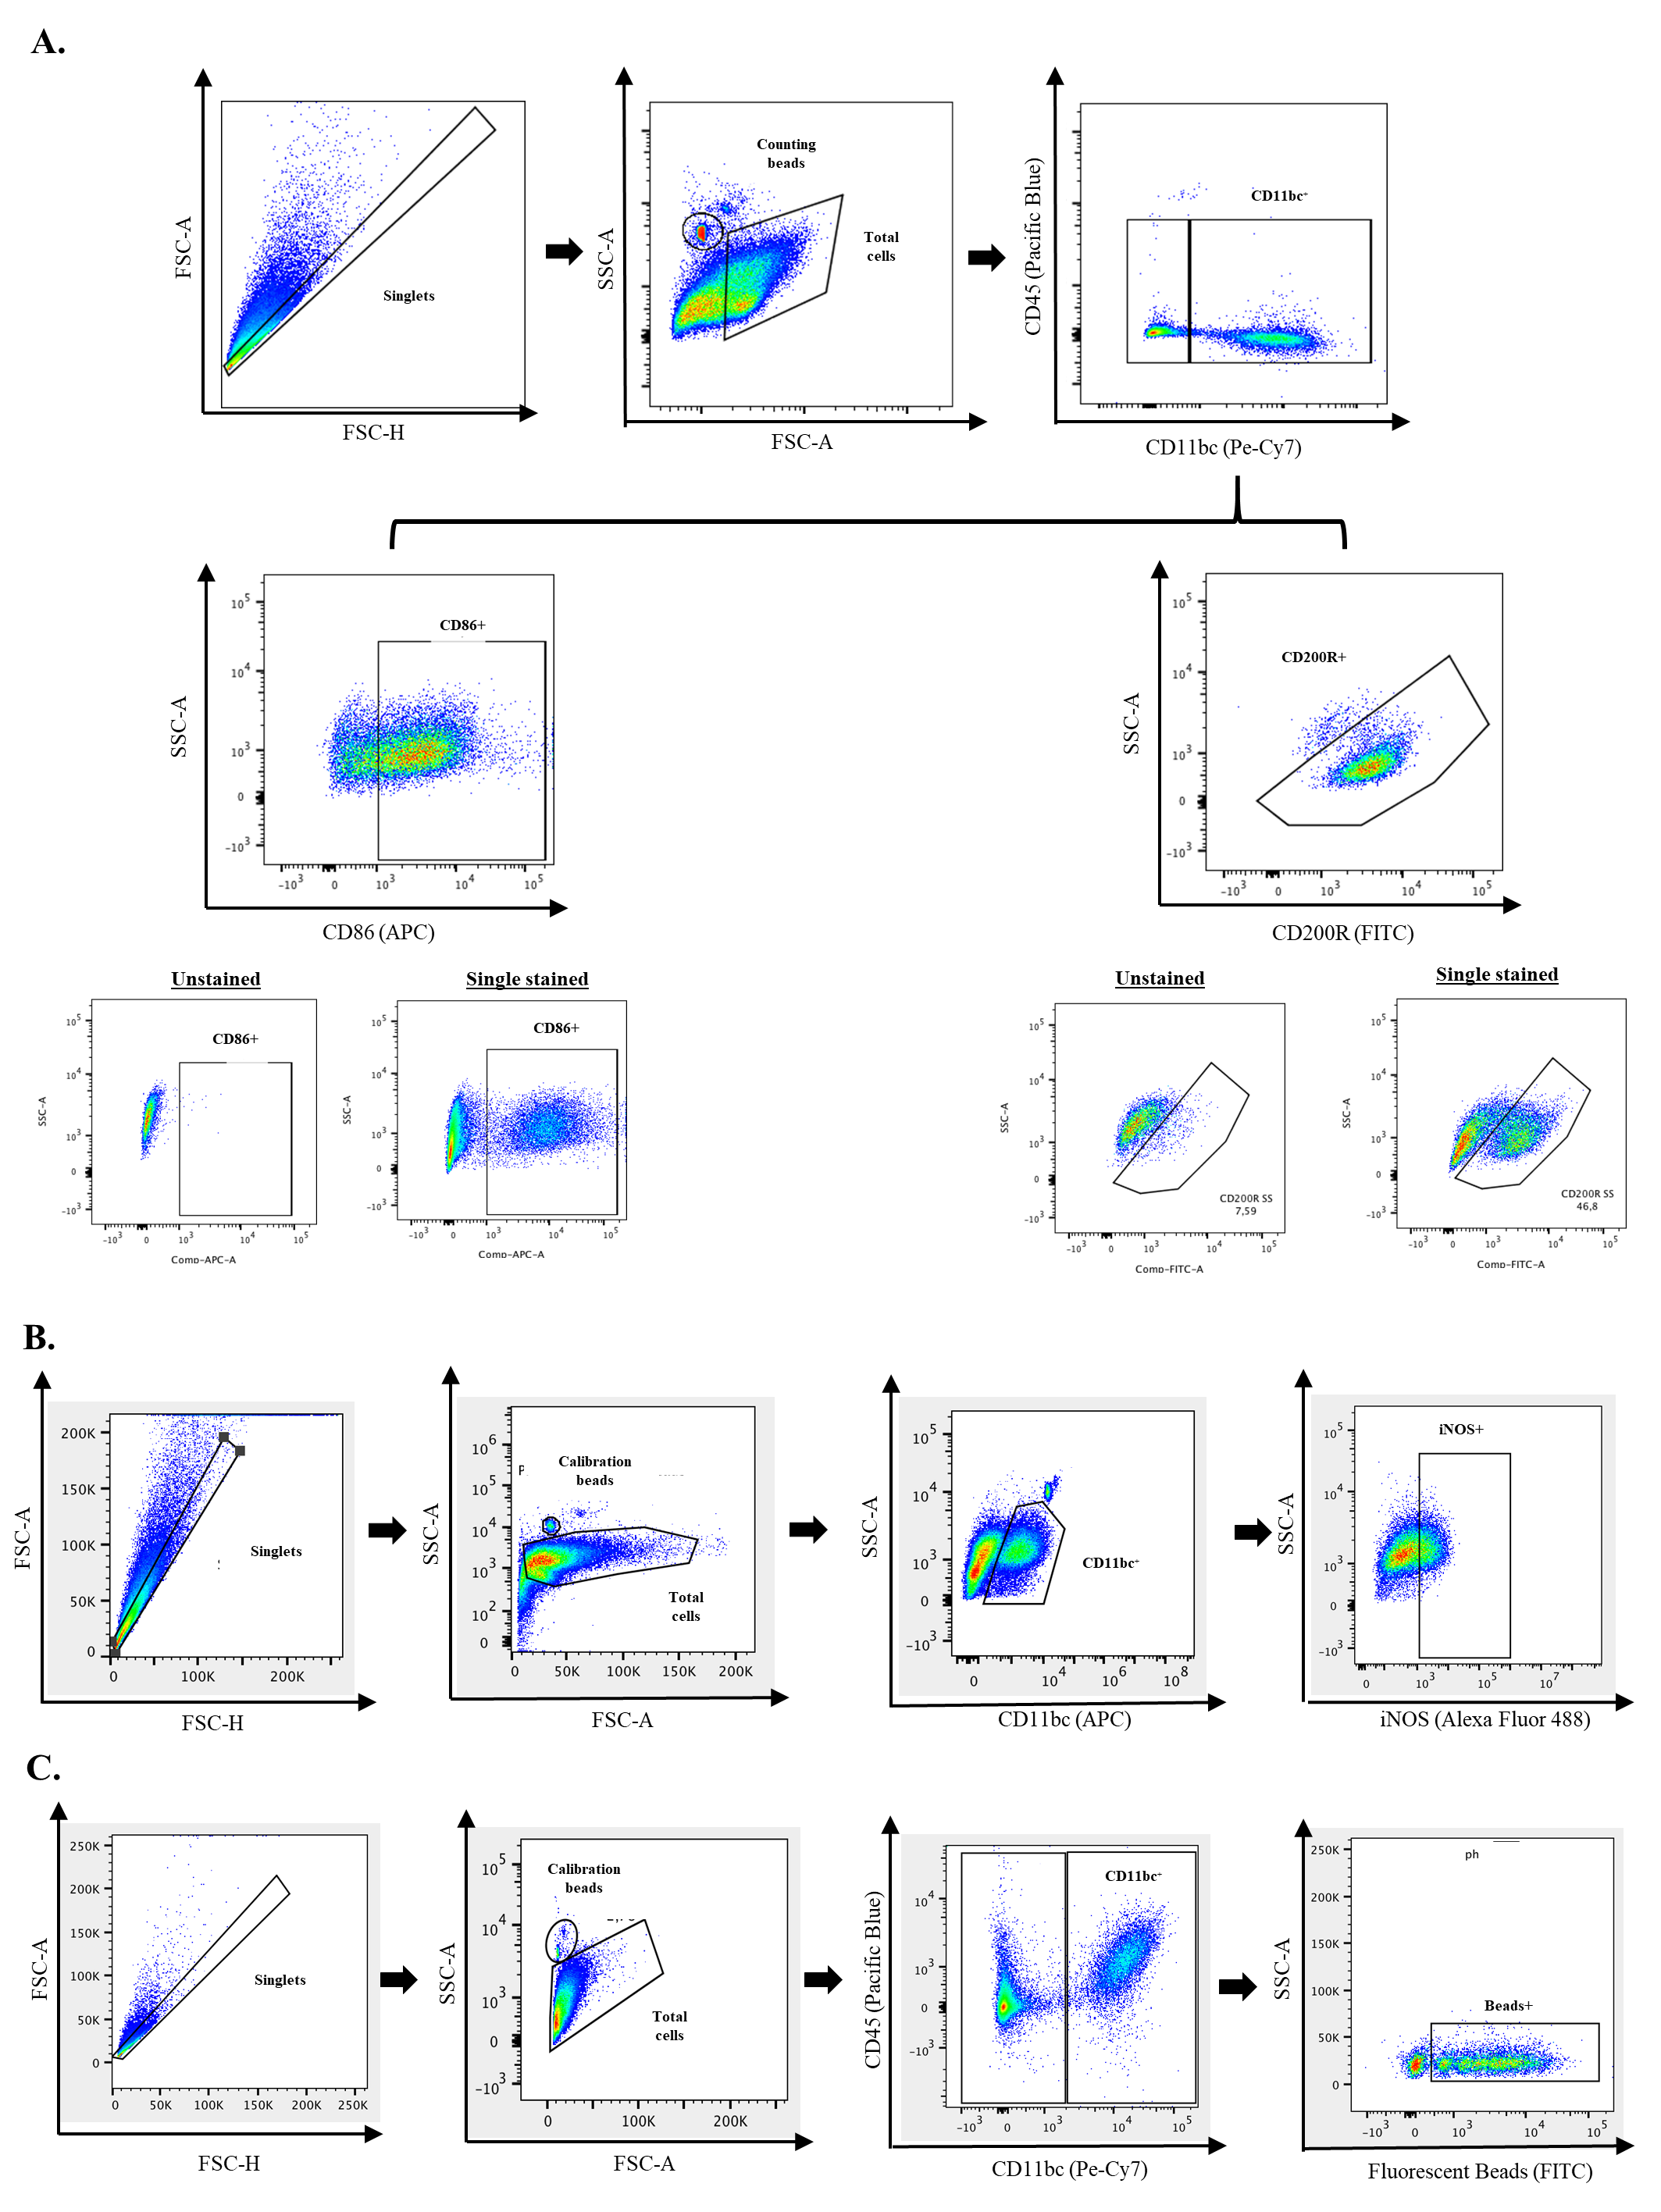


**Supplementary Figure S1.** Flow cytometry gating strategy A. Gating strategy used for flow cytometry cell number and microglia activation analysis on in vitro glial culture analysis. Doublets were excluded by FSC-A vs FSC-H scatter. Culture total cells were gated by SSC-A vs FSC-A scatter in which it was also selected the counting beads used to calculate cell concentration. Microglial cells were gated by CD45+CD11bc+ cells and on this population CD86+ cells and CD200R+ cells were defined according to unstained and single stained samples. B. Gating strategy used for flow cytometry microglia iNOS activation analysis. Doublets were excluded by FSC-A vs FSC-H scatter. Culture total cells were gated by SSC-A vs FSC-A scatter. Microglial cells were gated by CD11bc+ cells and on this population iNOS+ cells were defined according to unstained and single stained samples. C. Gating strategy used for flow cytometry microglia phagocytosis analysis. Doublets were excluded by FSC-A vs FSC-H scatter. Microglial cells were gated by CD45+CD11bc+ cells and on this population cells that present beads engulfed were gated as Beads+ cells.
